# Supplementary material
Source: PubMed Central journal article supplement (PMC4648367)

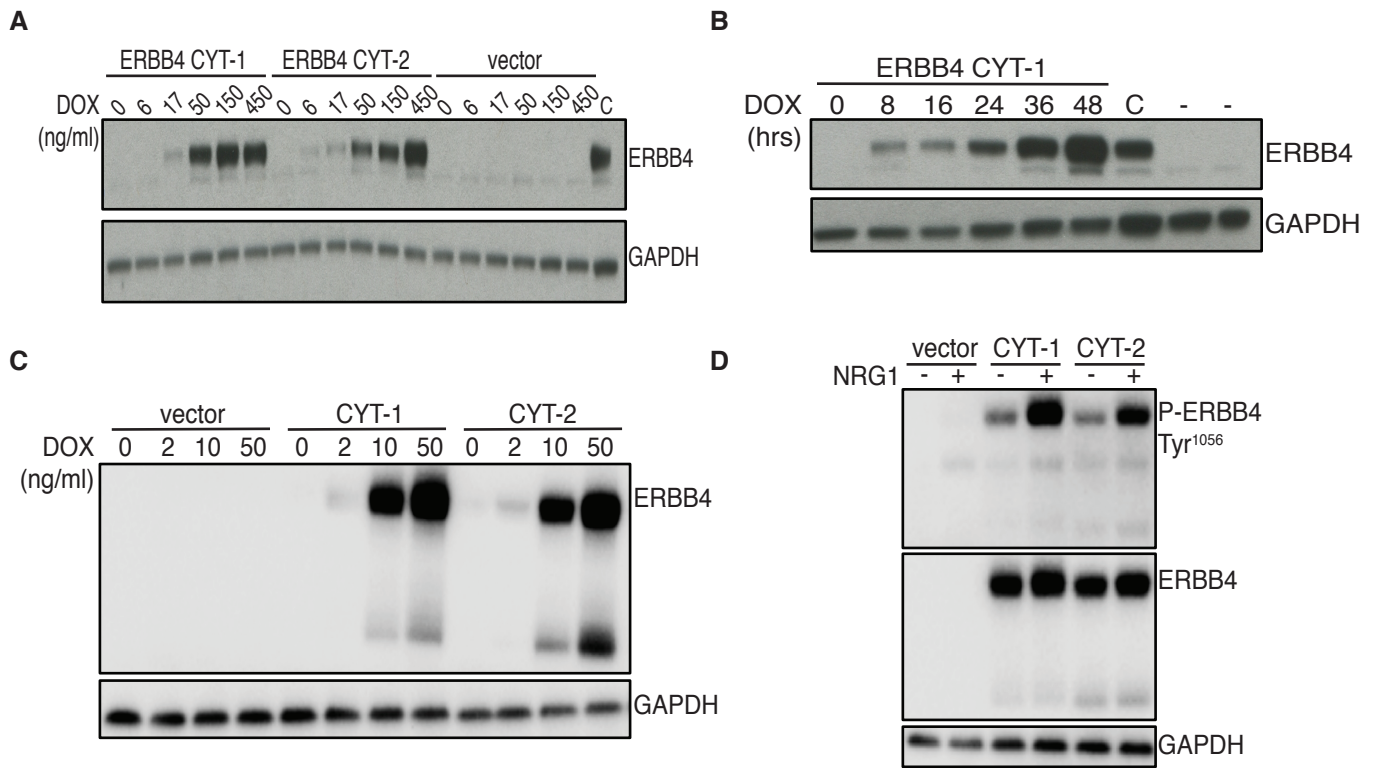

Supplemental Figure S1

Supplement: NIHMS735386-supplement-Figure_S1.pdf [file NIHMS735386-supplement-Figure_S1.pdf]

**A**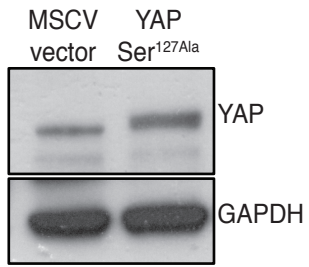**B**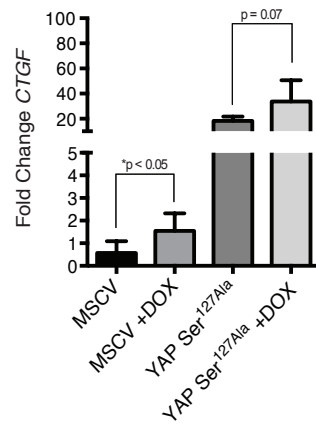

Supplemental Figure S2

Supplement: NIHMS735386-supplement-Figure_S2.pdf [file NIHMS735386-supplement-Figure_S2.pdf]

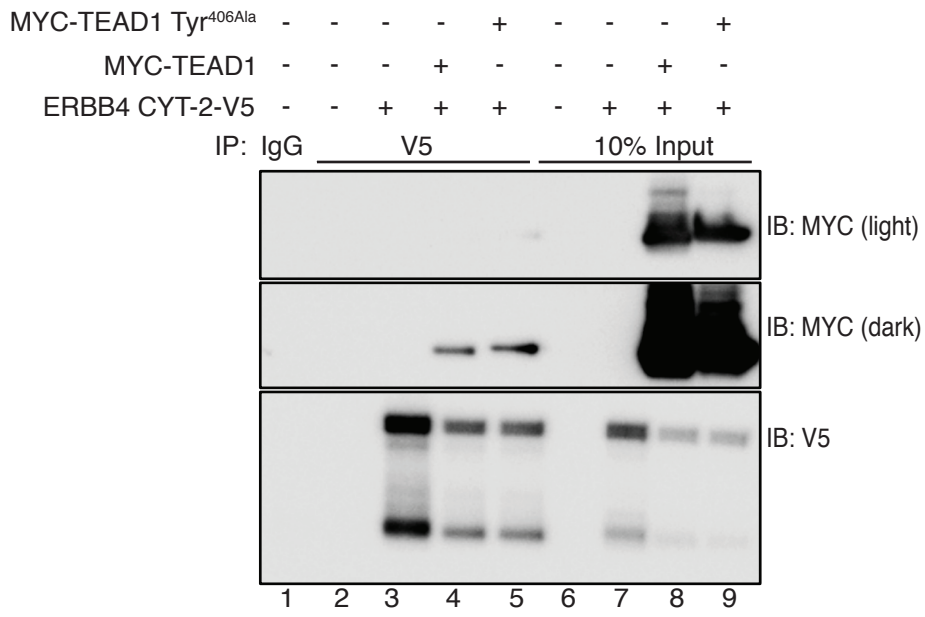

Supplemental Figure S3

Supplement: NIHMS735386-supplement-Figure_S3.pdf [file NIHMS735386-supplement-Figure_S3.pdf]

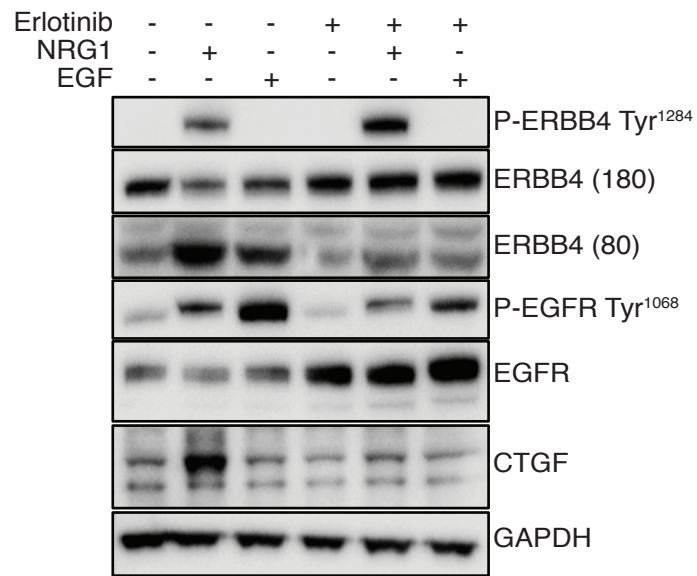

Supplemental Figure S4

Supplement: NIHMS735386-supplement-Figure_S4.pdf [file NIHMS735386-supplement-Figure_S4.pdf]

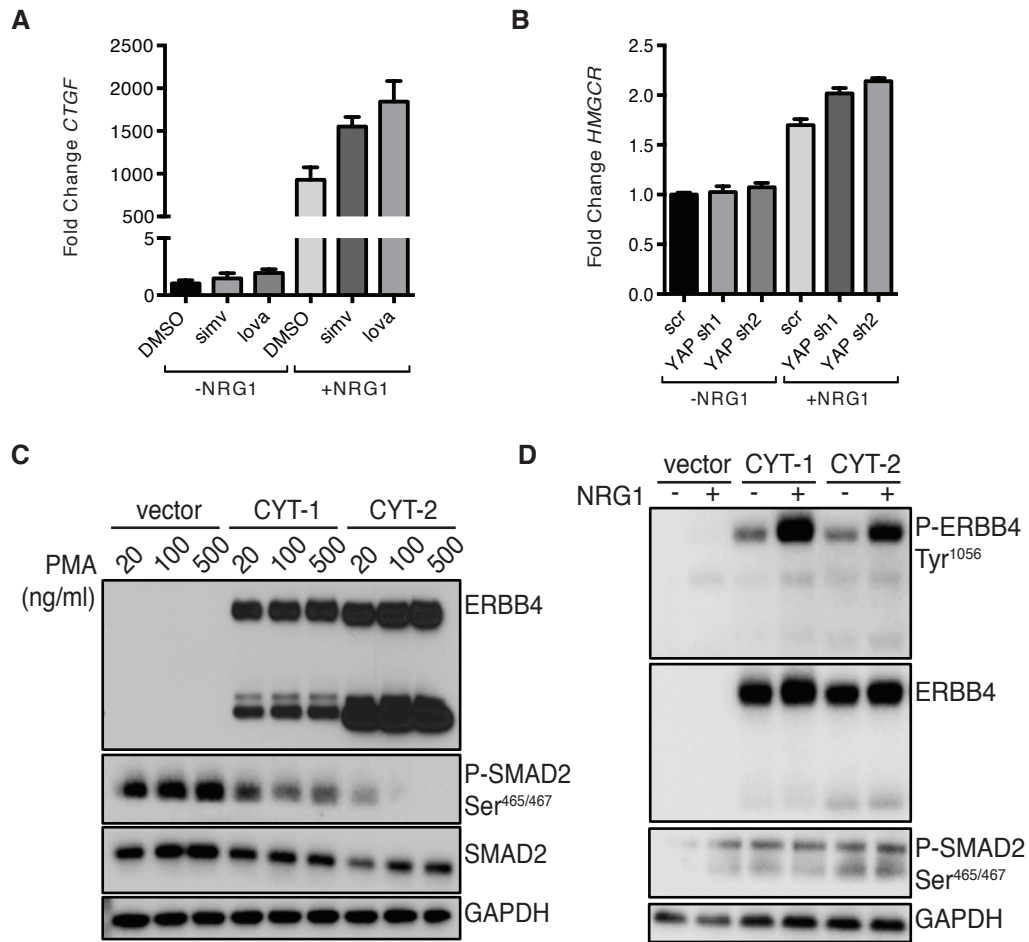

Supplemental Figure S5

Supplement: NIHMS735386-supplement-Figure_S5.pdf [file NIHMS735386-supplement-Figure_S5.pdf]

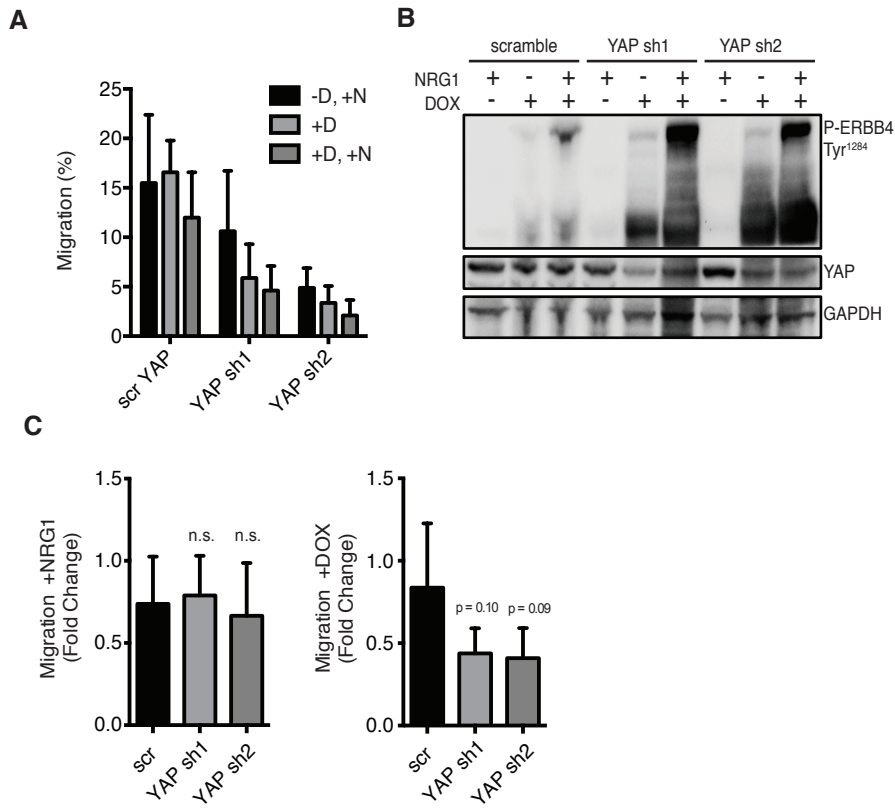

Supplemental Figure S6

Supplement: NIHMS735386-supplement-Figure_S6.pdf [file NIHMS735386-supplement-Figure_S6.pdf]
